# Supplementary material for: Early Detection of Toxic Cyanobacteria in Bulgarian Dam Water and In Vitro Evaluation of the Effect of Saponins From Astragalus glycyphyllos and A. glycyphylloides, in Cyanotoxin (Anatoxin-α)-Induced Neurotoxicity
Source: Springer Nature journal article supplement (doi:10.1007/s43450-020-00050-4), 2020-03-27
Supplement: 43450_2020_50_MOESM1_ESM.pdf [file 43450_2020_50_MOESM1_ESM.pdf]

## Supplementary Material

### **Early detection of toxic cyanobacteria in Bulgarian dam water and *in vitro* evaluation of the effect of saponins from *Astragalus glycyphyllos* and *A. glycyphylloides*, in cyanotoxin (anatoxin- $\alpha$ )-induced neurotoxicity**

Victoria Ilieva<sup>1\*</sup>, Aleksandar Shkondrov<sup>2</sup>, Denitsa Aluani<sup>1</sup>, Iva Valkova<sup>3</sup>, Magdalena Kondeva-Burdina<sup>1</sup>, Tzveta Georgieva<sup>4</sup>, Virginia Tzankova<sup>1</sup>, Ilina Krasteva<sup>2</sup>, Milen Georgiev<sup>5</sup>

<sup>1</sup> *Laboratory of Drug Metabolism and Drug Toxicity, Department of Pharmacology, Pharmacotherapy and Toxicology, Faculty of Pharmacy, Medical University of Sofia, 2 Dunav St., 1000 Sofia, Bulgaria*

<sup>2</sup> *Department of Pharmacognosy, Faculty of Pharmacy, Medical University of Sofia, Sofia, Bulgaria*

<sup>3</sup> *Department of Chemistry, Faculty of Pharmacy, Medical University of Sofia, Sofia, Bulgaria*

<sup>4</sup> *Laboratory of Genetically Modified Organisms, National Center of Public Health and Analyses, Sofia, Bulgaria*

<sup>5</sup> *Laboratory of Applied Biotechnologies, The Stephan Angeloff Institute of Microbiology, Bulgarian Academy of Sciences, Plovdiv, Bulgaria*

#### **\*Corresponding author:**

Viktoria Bozhidarova Ilieva, Laboratory of Drug Metabolism and Drug Toxicity, Section of Toxicology, Department of Pharmacology, Pharmacotherapy and Toxicology, Faculty of Pharmacy, Medical University of Sofia, 2 Dunav St., 1000 Sofia, Bulgaria

E-mail: shkondrov@pharmfac.mu-sofia.bg

**Supplementary Table 1.** Results of the PCR analysis. Data are mean values  $\pm$  SD. Groups were compared by non-parametric Mann-Whitney test. Standard 7300 Mode

| <b>Sample name</b>              | <b>Detector</b>  | <b>Task</b> | <b>Ct</b> | <b>SD Ct</b> |
|---------------------------------|------------------|-------------|-----------|--------------|
| NTC*                            | <i>Cyano 16s</i> | NTC*        | 36.39     | 0.258        |
| NTC*                            | <i>Cyano 16s</i> | NTC*        | 36.75     | 0.258        |
| POS Durankulak1                 | <i>Cyano 16s</i> | POS**       | 112.53    | 0.144        |
| POS Durankulak 2                | <i>Cyano 16s</i> | POS**       | 111.29    | 0.144        |
| Studena 1 (Xantogenate)         | <i>Cyano 16s</i> | Unknown     | 24.38     | 0.112        |
| Studena 2 (Xanthogenate)        | <i>Cyano 16s</i> | Unknown     | 24.41     | 0.112        |
| Studena 1 (Fast Lysis buffer)   | <i>Cyano 16s</i> | Unknown     | 19.50     | 0.026        |
| Studena 2 (Fast Lysis buffer)   | <i>Cyano 16s</i> | Unknown     | 19.35     | 0.026        |
| Pchelina 1 (xanthogenate)       | <i>Cyano 16s</i> | Unknown     | 15.43     | 0.208        |
| Pchelina 2 (xanthogenate)       | <i>Cyano 16s</i> | Unknown     | 15.14     | 0.208        |
| Pchelina 1 (Fast Lysis buffer)  | <i>Cyano 16s</i> | Unknown     | 14.35     | 0.285        |
| Pchelina 2 (Fast Lysis buffer)  | <i>Cyano 16s</i> | Unknown     | 14.22     | 0.285        |
| Bistritsa 1 (xanthogenate)      | <i>Cyano 16s</i> | Unknown     | 21.46     | 0.433        |
| Bistritsa 2 (xanthogenate)      | <i>Cyano 16s</i> | Unknown     | 21.37     | 0.433        |
| Bistritsa 1 (Fast Lysis buffer) | <i>Cyano 16s</i> | Unknown     | 21.23     | 0.085        |
| Bistritsa 2 (Fast lysis buffer) | <i>Cyano 16s</i> | Unknown     | 21.05     | 0.085        |

\*NTC – negative control, nuclease-free water; \*\*POS – Positive internal control

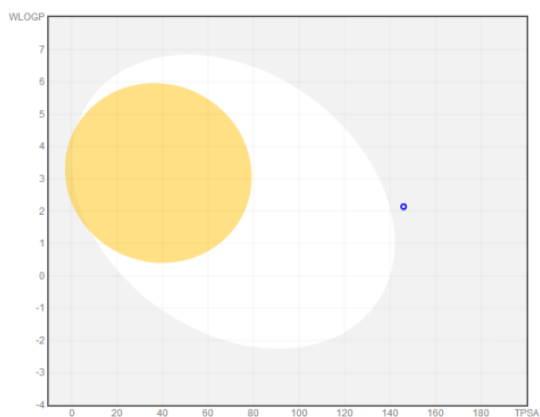

S1

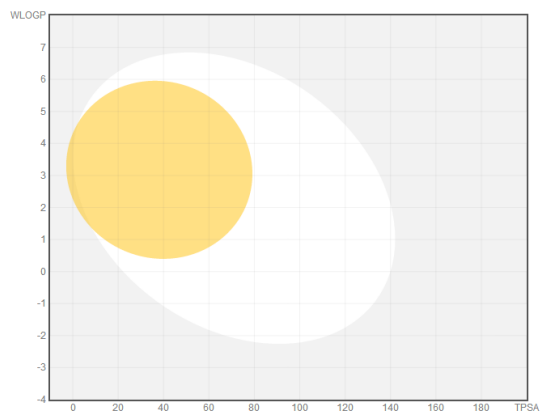

S2

**Supplementary Figure 1.** Representation of the BOILED-Egg model for the investigated compounds.

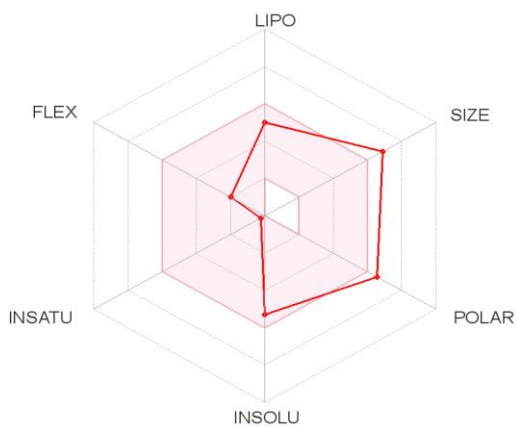

S1

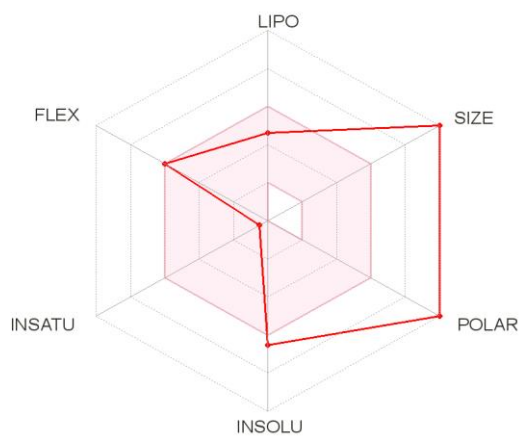

S2

**Supplementary Figure 2.** Bioavailability Radar prediction of drug-likeness of the investigated compounds.
